# Supplementary material
Source: MDPI journal article supplement (https://www.mdpi.com/2227-9717/11/12/3420)
Supplement: s1 [file s1]

# Residence Time Distribution: Literature Survey, Functions, Mathematical Modeling, and Case Study – Diagnosis for a Photochemical Reactor

Mircea Teodor Nechita <sup>1</sup>, Gabriel Dan Suditu <sup>1</sup>, Adrian Cătălin Puișel <sup>1</sup> and Elena Niculina Drăgoi <sup>1,\*</sup>

<sup>1</sup> "Cristofor Simionescu" Faculty of Chemical Engineering and Environmental Protection, "Gheorghe Asachi" Technical University of Iasi, Bld. D Mangeron, no 73, Iasi, Romania; [mircea-teodor.nechita@academic.tuiasi.ro](mailto:mircea-teodor.nechita@academic.tuiasi.ro) (MTN), [gabriel-dan.suditu@academic.tuiasi.ro](mailto:gabriel-dan.suditu@academic.tuiasi.ro) (GDS), [adrian-catalin.puistel@academic.tuiasi.ro](mailto:adrian-catalin.puistel@academic.tuiasi.ro) (ACP), [elena-niculina.dragoi@academic.tuiasi.ro](mailto:elena-niculina.dragoi@academic.tuiasi.ro) (END)

\* Correspondence: [elena-niculina.dragoi@academic.tuiasi.ro](mailto:elena-niculina.dragoi@academic.tuiasi.ro) (END)

**Table S1.** Dankwerts' works, followers, and contributors to RTD methodology progress

| Name                                | Period/year         | Representative study                                                                                | Other works   |
|-------------------------------------|---------------------|-----------------------------------------------------------------------------------------------------|---------------|
| Dankwerts P. V.                     | 1950 - 1960         | Continuous flow systems. Distribution of residence times [1], reprinted in 1995 [2]                 | [3-6]         |
| Zwietering Th. N.                   | 1959                | The degree of mixing in continuous flow systems [7]                                                 | [8]           |
| Bischoff K. B. and McCracken, E. A. | 1966                | Tracer tests in flow systems [9]                                                                    | [10]          |
| Cholette A. and Cloutier L.         | 1960 - 1970         | Mixing efficiency determinations for continuous flow systems [11]                                   | [12-14]       |
| Levenspiel O.                       | 1960 –1970<br>2011  | Tracer curves and the residence time distribution [15]                                              | [16-21]       |
| Shinnar R.                          | 1960 –1970<br>1993  | Representation and Evaluation of Residence Time Distributions [22]                                  | [23-25]       |
| Buffham B. A.                       | 1970 - 1990         | The washout curve, residence-time distribution, and F curve in tracer kinetics [26]                 | [27-36]       |
| Gibilaro L. G.                      | 1970 - 1980         | On the residence time distribution for systems with open boundaries [37]                            | [32,33,38,39] |
| Nauman E. B.                        | 1970 – 1990<br>2008 | Residence Time Theory [40]                                                                          | [36,41-48]    |
| Martin A. D.                        | 2000                | Interpretation of residence time distribution data [49]                                             | [50]          |
| Leclerc J. P., et al.               | 2000                | Theoretical interpretation of residence-time distribution measurements in industrial processes [51] | [51-53]       |

**Table S2.** Prominent chemical engineering student's textbooks covering RDT methodology\*

| Authors/Editors                           | Title                                              | Vol./Ed.                   | Year | Ref. no |
|-------------------------------------------|----------------------------------------------------|----------------------------|------|---------|
| Levenspiel, O.                            | Chemical reaction engineering                      | 3 <sup>rd</sup> Ed.        | 1998 | [54]    |
| Schmidt, L. D.                            | The engineering of chemical reactions              | 2 <sup>nd</sup> Ed.        | 2005 | [55]    |
| Nauman, E. B.                             | Chemical reactor design, optimization, and scaleup | 2 <sup>nd</sup> Ed.        | 2008 | [56]    |
| Fogler, S. H.                             | Essentials of Chemical Reaction Engineering        | 1 <sup>st</sup> Ed.        | 2010 | [57]    |
|                                           | Elements of chemical reaction engineering          | 4 <sup>th</sup> Ed.        | 2016 | [58]    |
| Green, D. W. and Southard, M. Z           | Perry's Chemical Engineers' Handbook               | 8 <sup>th</sup> Ed.        | 2019 | [59]    |
| Ravi, R.; Vinu, R. G.; Sathyanarayana, N. | Coulson and Richardson's Chemical Engineering      | Vol. 3/4 <sup>th</sup> Ed. | 2017 | [60]    |

\*Only the last editions are chronologically reported.

**Table S3.** Residence time distribution reviews in various industrial fields

| Authors                              | Title                                                                                                                         | Year | Area of application                                    | Ref. no. |
|--------------------------------------|-------------------------------------------------------------------------------------------------------------------------------|------|--------------------------------------------------------|----------|
| Swaine, D. E. and Daugulis, A. J.    | Review of Liquid Mixing in Packed Bed Biological Reactors                                                                     | 1988 | Bioreactors                                            | [61]     |
| Ramaswamy, H. S et al.               | Residence time distribution (RTD) in aseptic processing of particulate foods: a review                                        | 1995 |                                                        | [62]     |
| Torres, A. P. and Oliveira, F. A. R. | Residence time distribution studies in continuous thermal processing of liquid foods: a review                                | 1998 | Food processing                                        | [63]     |
| Ganjyal, G. and Hanna, M.            | A Review on Residence Time Distribution (RTD) in Food Extruders and Study on the Potential of Neural Networks in RTD Modeling | 2002 |                                                        | [64]     |
| Gao, Y. et al.                       | A review of the Residence Time Distribution (RTD) applications in solid unit operations                                       | 2012 | Solid particles processing                             | [65]     |
| Leray, E. et al.                     | Residence time distributions for hydrologic systems: Mechanistic foundations and steady-state analytical solutions            | 2016 | Hydrology                                              | [66]     |
| Sheoran, M. et al.                   | Residence time distribution studies using radiotracers in chemical industry – A review                                        | 2018 | RTD diagnosis using radiotracers in various industries | [67]     |
| Bérard, A. et al.                    | Experimental methods in chemical engineering: Residence time distribution – RTD                                               | 2020 | Chemical engineering                                   | [68]     |
| Reis M.H. et al.                     | The Influence of Residence Time Distribution on Continuous-Flow Polymerization                                                | 2019 | Polymers                                               | [69]     |
| Bhalode, P. et al.                   | Using residence time distribution in pharmaceutical solid dose manufacturing – A critical review                              | 2021 | Pharmaceutics                                          | [70]     |

|                                 |                                                                                                                                            |      |                      |      |
|---------------------------------|--------------------------------------------------------------------------------------------------------------------------------------------|------|----------------------|------|
| Stephenson, R. and Sheridan, C. | Review of experimental procedures and modelling techniques for flow behaviour and their relation to residence time in constructed wetlands | 2021 | Wetland modelling    | [71] |
| Rodrigues, A. E.                | Experimental methods in chemical engineering: Residence time distribution—RTD                                                              | 2021 | Chemical engineering | [72] |
| Wang Z. et al.                  | Residence Time Distribution (RTD) Applications in Continuous Casting Tundish: A Review and New Perspectives                                | 2022 | Metallurgy           | [73] |
| Ding, C. et al.                 | Challenge of Residence Time Distribution Curve in Tundish for Continuous Casting of Steel                                                  | 2022 |                      | [74] |
| Sarkar M. et al.                | Application of tracer technology in wastewater treatment processes: a review                                                               | 2023 | Wastewater treatment | [75] |
| Cherkasov, N. et al.            | Continuous stirred tank reactors in fine chemical synthesis for efficient mixing, solids-handling, and rapid scale-up                      | 2023 | Chemical engineering | [76] |

**Table S4.** Typical dimensionless numbers used in RTD analysis

| Formula                                                 | Representative relations                                                                                                                                                      | Observations                            | Ref. no. |
|---------------------------------------------------------|-------------------------------------------------------------------------------------------------------------------------------------------------------------------------------|-----------------------------------------|----------|
| $Pe = \frac{v \cdot l}{D}$                              | $E(\theta) = \frac{\sqrt{Pe}}{2 \cdot \sqrt{\pi \cdot \theta}} \cdot \exp\left(-\frac{Pe \cdot (1 - \theta^2)}{4 \cdot \theta}\right)$ (standard dispersion model)            | $Pe = Bo \cdot \frac{L}{l}$             | [72,77]  |
| $Bo = \frac{v \cdot L}{D_{ax}}$                         | $\sigma_{\theta}^2 = \frac{\sigma^2}{\tau^2} = \frac{2}{Bo} + \frac{8}{Bo^2}$ (open-open boundaries)                                                                          | $Bo \rightarrow \infty$ plug flow       | [78,79]  |
|                                                         | $\sigma_{\theta}^2 = \frac{\sigma^2}{\tau^2} = \frac{2}{Bo} - \frac{2}{Bo^2} \cdot (1 - e^{Bo})$ (closed – closed boundaries)                                                 | $Bo \rightarrow 0$ perfectly mixed flow | [80]     |
| $Da_1 = k \cdot t$<br>first order reaction              | $\eta = 1 - \frac{4 \cdot q \cdot \exp\left(\frac{Pe}{2}\right)}{(1+q)^2 \cdot \exp\left(\frac{Pe \cdot q}{2}\right) - (1-q)^2 \cdot \exp\left(-\frac{Pe \cdot q}{2}\right)}$ | If $Da < 0.1$ then $\eta < 0.1$         | [58]     |
| $Da_2 = k \cdot C_A^0 \cdot t$<br>second order reaction | $q = \sqrt{1 + \frac{4 \cdot Da}{Pe}}$<br>(closed – closed boundaries, first-order reaction)                                                                                  | If $Da > 10$ then $\eta > 0.9$          |          |

where  $v$  represents flow velocity;  $L$  represents the systems length;  $l$  represents the characteristic length;  $D_{ax}$  = axial dispersion coefficient;  $D$  = mass diffusion coefficient,  $\eta$  = conversion

**Table S5** Representative non-ideal flow models

| Name              | Description                                                                                            | Parameters      | Representative equation                                                                                                                                                                                     | Ref. no. |
|-------------------|--------------------------------------------------------------------------------------------------------|-----------------|-------------------------------------------------------------------------------------------------------------------------------------------------------------------------------------------------------------|----------|
| Cholette-Cloutier | The model associates a perfectly mixed tank, a bypass, and a dead zone.<br>$V_D = (1 - \beta) \cdot V$ | $\alpha, \beta$ | $E(t) = \alpha \cdot \delta(t) + (1 - \alpha) \cdot \frac{(1 - \alpha)}{\beta \cdot t_s} \cdot \exp\left(-\frac{(1 - \alpha) \cdot t}{\beta \cdot t_s}\right)$<br>where $\delta(t)$ is Dirac delta function | [13,72]  |

---


$$V_R = \beta \cdot V$$

|                  |                                                                                                                                                                                         |               |                                                                                                                                                                                                                                                                                                                                                                                                                                                                                                                                                                                                                                                                                                                                                                     |               |
|------------------|-----------------------------------------------------------------------------------------------------------------------------------------------------------------------------------------|---------------|---------------------------------------------------------------------------------------------------------------------------------------------------------------------------------------------------------------------------------------------------------------------------------------------------------------------------------------------------------------------------------------------------------------------------------------------------------------------------------------------------------------------------------------------------------------------------------------------------------------------------------------------------------------------------------------------------------------------------------------------------------------------|---------------|
| Tank-in-series   | <p>The model associates an "n" number of perfectly mixed, equal-volume tanks.</p> $M_v^0 = M_v^i = M_v^n$ $t_s = t_s^1 + \dots + t_s^i + \dots + t_s^n$                                 | $n$ (or $N$ ) | $E(\theta) = \frac{n^n}{(n-1)!} \cdot \theta^{n-1} \cdot e^{-\theta \cdot n}$ $F(\theta) = 1 - e^{-\theta \cdot n} \cdot \left[ 1 + \sum_{i=1}^n \frac{(n \cdot \theta)^{i-1}}{i!} \right]$ $\delta_\theta^2 = \frac{1}{n}$                                                                                                                                                                                                                                                                                                                                                                                                                                                                                                                                         | [17,32,81,82] |
| Axial dispersion | <p>The model considers a plug flow that admits mixing and axial dispersion in the flow direction. System boundaries can be open, closed, or a combination of the two.</p> $C = f(t, z)$ | $D_{ax}$      | <p>If <math>n \rightarrow 0</math>, the series behaves as a perfectly mixed tank</p> <p>If <math>n \rightarrow \infty</math> the series behave as a plug flow</p> $E(\theta) = \frac{1}{2 \cdot \theta} \cdot \sqrt{\frac{Bo}{\pi \cdot \theta}} \cdot \exp\left(-\frac{(1-\theta)^2 \cdot Bo}{4 \cdot \theta}\right)$ <p>open – open boundaries</p> $E(\theta) = e^{\frac{Pe}{2}} \cdot \sum_{i=1}^{\infty} \frac{(-1)^{i+1} \cdot 8 \cdot \alpha_i^2 \cdot e^{\left(\frac{4 \cdot \alpha_i^2 + Pe^2}{4 \cdot Pe}\right)}}{Pe^2 + 4 \cdot Pe + 4 \cdot \alpha_i^2},$ <p>Where <math>\alpha_i</math> are the positive roots of the equation: <math>tg \alpha = \frac{4 \cdot Pe \cdot \alpha}{4 \cdot \alpha^2 - Pe^2}</math></p> <p>Closed – closed boundaries</p> | [82-84]       |

---

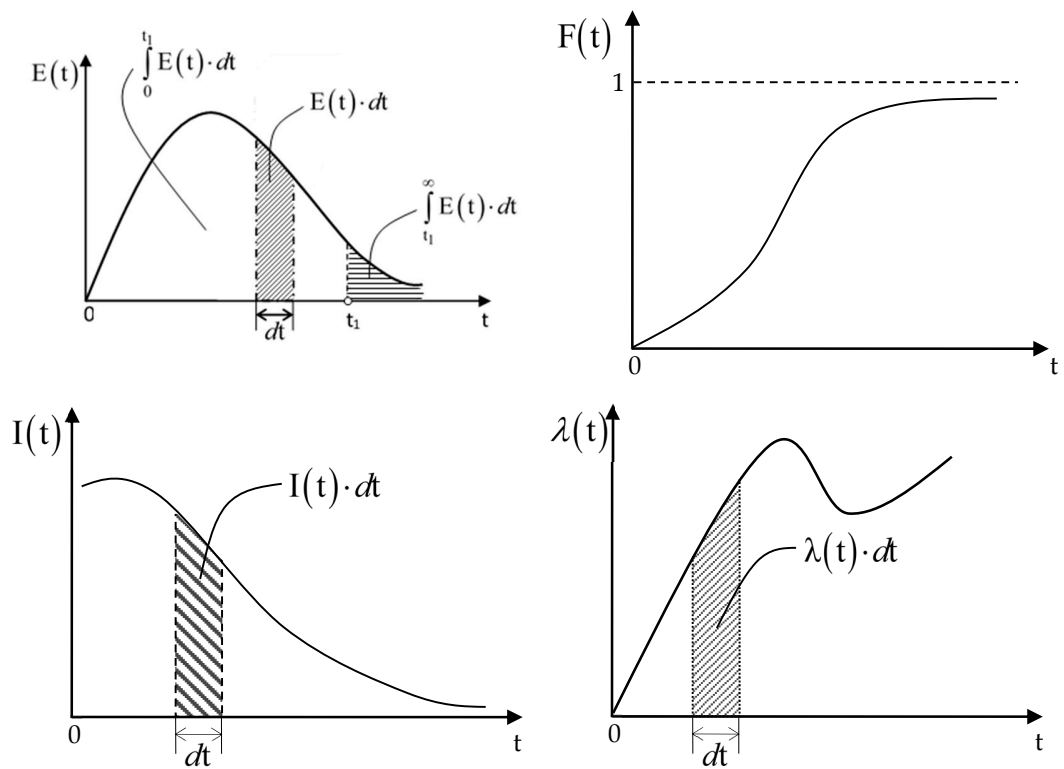

Figure S1. Typical RTD functions

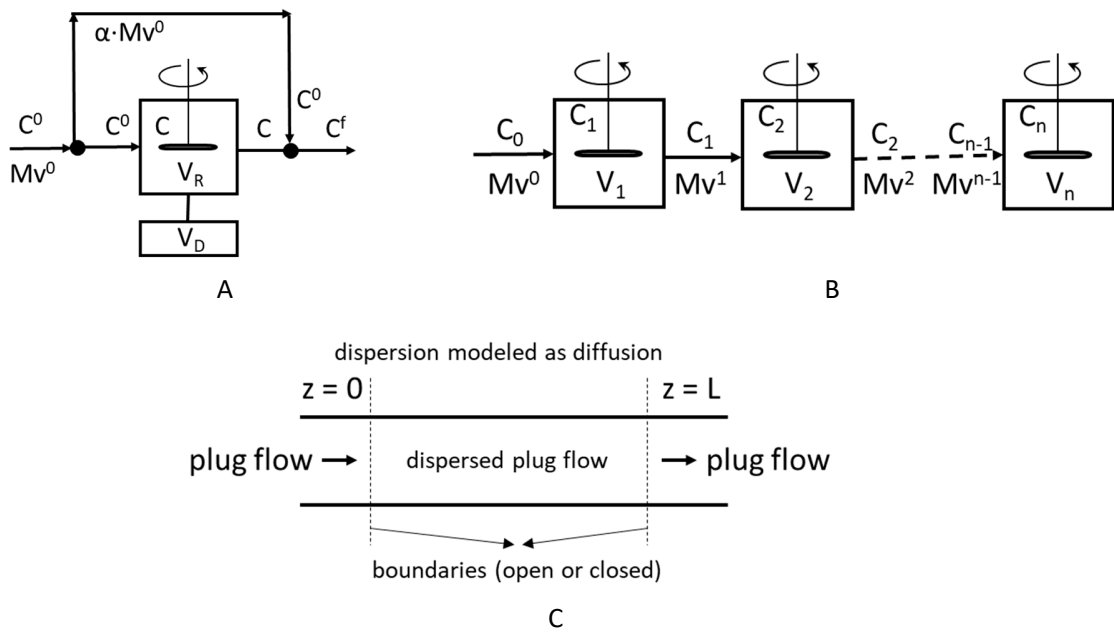

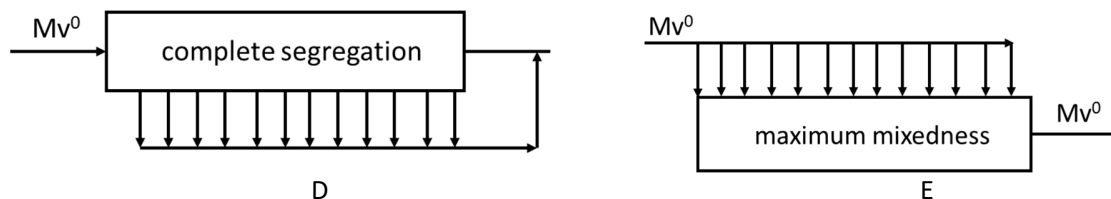

**Figure S2.** Representative non-ideal flow and mixing models: **A:** Cholette-Cloutier model; **B:** Tank-in-series model; **C:** Axial dispersion model; **D:** Complete segregation model; **E:** Maximum mixedness model

## References

1. Danckwerts, P.V. Continuous flow systems. Distribution of residence times. *Chemical Engineering Science* **1953**, 2, 1-13, doi:[10.1016/0009-2509\(53\)80001-1](https://doi.org/10.1016/0009-2509(53)80001-1).
2. Danckwerts, P.V. Continuous flow systems. Distribution of residence times. *Chemical Engineering Science* **1955**, 50, 3857-3866, doi:[https://doi.org/10.1016/0009-2509\(96\)81811-2](https://doi.org/10.1016/0009-2509(96)81811-2).
3. Danckwerts, P.V. Local residence-times in continuous-flow systems. *Chemical Engineering Science* **1958**, 9, 78-79, doi:[https://doi.org/10.1016/0009-2509\(58\)87011-6](https://doi.org/10.1016/0009-2509(58)87011-6).
4. Danckwerts, P.V. The effect of incomplete mixing on homogeneous reactions. *Chemical Engineering Science* **1958**, 8, 93-102, doi:[https://doi.org/10.1016/0009-2509\(58\)80040-8](https://doi.org/10.1016/0009-2509(58)80040-8).
5. Danckwerts, P.V.; Jenkins, J.W.; Place, G. The distribution of residence-times in an industrial fluidised reactor. *Chemical Engineering Science* **1954**, 3, 26-35, doi:[https://doi.org/10.1016/0009-2509\(54\)80004-2](https://doi.org/10.1016/0009-2509(54)80004-2).
6. Danckwerts, P.V.; Wilson, R.A.M. Flow-visualization by means of a time-reaction. *Journal of Fluid Mechanics* **1963**, 16, 412-416, doi:[10.1017/S0022112063000860](https://doi.org/10.1017/S0022112063000860).
7. Zwietering, T.N. The degree of mixing in continuous flow systems. *Chemical Engineering Science* **1959**, 11, 1-15, doi:[https://doi.org/10.1016/0009-2509\(59\)80068-3](https://doi.org/10.1016/0009-2509(59)80068-3).
8. Zwietering, T.N. A backmixing model describing micromixing in single-phase continuous-flow systems. *Chemical Engineering Science* **1984**, 39, 1765-1778, doi:[https://doi.org/10.1016/0009-2509\(84\)80112-8](https://doi.org/10.1016/0009-2509(84)80112-8).
9. Bischoff, K.B.; McCracken, E.A. Tracer tests in flow systems. *Industrial & Engineering Chemistry* **1966**, 58, 18-31, doi:[10.1021/ie50679a005](https://doi.org/10.1021/ie50679a005).
10. Bischoff, K.B. Mixing and contacting in chemical reactors. *Industrial & Engineering Chemistry* **1966**, 58, 18-32, doi:[10.1021/ie50683a006](https://doi.org/10.1021/ie50683a006).
11. Cholette, A.; Cloutier, L. Mixing efficiency determinations for continuous flow systems. *The Canadian Journal of Chemical Engineering* **1959**, 37, 105-112, doi:[10.1002/cjce.5450370305](https://doi.org/10.1002/cjce.5450370305).
12. Chiang, D.; Cholette, A. Internal age and residence time distributions of a fluid in non-ideal stirred tanks in series. *The Canadian Journal of Chemical Engineering* **1971**, 49, 484-487, doi:<https://doi.org/10.1002/cjce.5450490409>.
13. Cholette, A.; Blanchet, J.; Cloutier, L. Performance of flow reactors at various levels of mixing. *The Canadian Journal of Chemical Engineering* **1960**, 38, 1-18, doi:<https://doi.org/10.1002/cjce.5450380102>.
14. Cloutier, L.; Cholette, A. Effect of various parameters on the level of mixing in continuous flow systems. *The Canadian Journal of Chemical Engineering* **1968**, 46, 82-88, doi:<https://doi.org/10.1002/cjce.5450460203>.
15. Levenspiel, O.; Lai, B.W.; Chatlynne, C.Y. Tracer curves and the residence time distribution. *Chemical Engineering Science* **1970**, 25, 1611-1613, doi:[https://doi.org/10.1016/0009-2509\(70\)85084-9](https://doi.org/10.1016/0009-2509(70)85084-9).

16. Levenspiel, O.; Smith, W.K. Notes on the diffusion-type model for the longitudinal mixing of fluids in flow. *Chemical Engineering Science* **1995**, *50*, 3891-3896, doi:[https://doi.org/10.1016/0009-2509\(96\)81817-3](https://doi.org/10.1016/0009-2509(96)81817-3).
17. Levenspiel, O. *Tracer technology: modeling the flow of fluids*; Springer Science & Business Media: 2011; Volume 96.
18. Levenspiel, O.; Turner, J.C.R. The interpretation of residence-time experiments. *Chemical Engineering Science* **1970**, *25*, 1605-1609, doi:[https://doi.org/10.1016/0009-2509\(70\)85083-7](https://doi.org/10.1016/0009-2509(70)85083-7).
19. Levenspiel, O.; Bischoff, K.B. Patterns of Flow in Chemical Process Vessels. In *Advances in Chemical Engineering*, Drew, T.B., Hoopes, J.W., Vermeulen, T., Eds.; Academic Press: 1964; Volume 4, pp. 95-198.
20. Levenspiel, O.; Bischoff, K.B. Backmixing in the Design of Chemical Reactors. *Industrial & Engineering Chemistry* **1959**, *51*, 1431-1434, doi:10.1021/ie50600a023.
21. Levenspiel, O. Mixed models to represent flow of fluids through vessels. *The Canadian Journal of Chemical Engineering* **1962**, *40*, 135-138, doi:<https://doi.org/10.1002/cjce.5450400402>.
22. Naor, P.; Shinnar, R. Representation and Evaluation of Residence Time Distributions. *Industrial & Engineering Chemistry Fundamentals* **1963**, *2*, 278-286, doi:10.1021/i160008a007.
23. Shinnar, R. On the behaviour of liquid dispersions in mixing vessels. *Journal of Fluid Mechanics* **1961**, *10*, 259-275, doi:10.1017/S0022112061000214.
24. Shinnar, R. Residence-time distributions and tracer experiments in chemical reactor design: the power and usefulness of a "wrong" concept. *revce* **1993**, *9*, 97, doi:10.1515/REVCE.1993.9.1-2.97.
25. Zvirin, Y.; Shinnar, R. Interpretation of internal tracer experiments and local sojourn time distributions. *International Journal of Multiphase Flow* **1976**, *2*, 495-520, doi:[https://doi.org/10.1016/0301-9322\(76\)90012-4](https://doi.org/10.1016/0301-9322(76)90012-4).
26. Buffham, B.A.; Kropholler, H.W. The washout curve, residence-time distribution, and F curve in tracer kinetics. *Mathematical Biosciences* **1970**, *6*, 179-184, doi:[https://doi.org/10.1016/0025-5564\(70\)90065-9](https://doi.org/10.1016/0025-5564(70)90065-9).
27. Buffham, B.A. Impulse Response of Infinite and Semi-Infinite Sequences of Identical Stirred Tanks with Backflow. *Industrial & Engineering Chemistry Fundamentals* **1969**, *8*, 428-430, doi:10.1021/i160031a011.
28. Buffham, B.A. On the residence-time distribution for a system with velocity profiles in its connections with the environment. *Chemical Engineering Science* **1972**, *27*, 987-991, doi:[https://doi.org/10.1016/0009-2509\(72\)80013-7](https://doi.org/10.1016/0009-2509(72)80013-7).
29. Buffham, B.A. Mean residence times in steady-flow and some non-flow systems. *Nature* **1978**, *274*, 879-880, doi:10.1038/274879a0.
30. Buffham, B.A. INTERNAL AND EXTERNAL RESIDENCE-TIME DISTRIBUTIONS. *Chemical Engineering Communications* **1983**, *22*, 105-107, doi:10.1080/00986448308940048.
31. Buffham, B.A. Residence-time distributions in regions of steady-flow systems. *Nature* **1985**, *314*, 606-608, doi:10.1038/314606a0.
32. Buffham, B.A.; Gibilaro, L.G. A generalization of the tanks-in-series mixing model. *AIChE Journal* **1968**, *14*, 805-806, doi:<https://doi.org/10.1002/aic.690140521>.
33. Buffham, B.A.; Gibilaro, L.G. A unified time delay model for dispersion in flowing media. *The Chemical Engineering Journal* **1970**, *1*, 31-36, doi:[https://doi.org/10.1016/0300-9467\(70\)85028-6](https://doi.org/10.1016/0300-9467(70)85028-6).
34. Buffham, B.A.; Kropholler, H.W. Tracer kinetics: some general properties, the mean residence time and applications to phase and chemical equilibria. *Chemical Engineering Science* **1973**, *28*, 1081-1089, doi:[https://doi.org/10.1016/0009-2509\(73\)80011-9](https://doi.org/10.1016/0009-2509(73)80011-9).
35. Buffham, B.A.; Mason, G. Holdup and dispersion: tracer residence times, moments and inventory measurements. *Chemical Engineering Science* **1993**, *48*, 3879-3887, doi:[https://doi.org/10.1016/0009-2509\(93\)80366-X](https://doi.org/10.1016/0009-2509(93)80366-X).

36. Buffham, B.A.; Nauman, E.B. On the limiting form of the residence-time distribution for a constant-volume recycle system. *Chemical Engineering Science* **1975**, *30*, 1519-1524, doi:[https://doi.org/10.1016/0009-2509\(75\)85030-5](https://doi.org/10.1016/0009-2509(75)85030-5).
37. Gibilaro, L.G. On the residence time distribution for systems with open boundaries. *Chemical Engineering Science* **1978**, *33*, 487-491, doi:[https://doi.org/10.1016/0009-2509\(78\)80008-6](https://doi.org/10.1016/0009-2509(78)80008-6).
38. Gibilaro, L.G. Mean residence times in continuous flow systems. *Nature* **1977**, *270*, 47-48, doi:10.1038/270047a0.
39. Gibilaro, L.G. Residence time distributions in regions of continuous flow systems. *Chemical Engineering Science* **1979**, *34*, 697-702, doi:[https://doi.org/10.1016/0009-2509\(79\)85116-7](https://doi.org/10.1016/0009-2509(79)85116-7).
40. Nauman, E.B. Residence Time Theory. *Industrial & Engineering Chemistry Research* **2008**, *47*, 3752-3766, doi:10.1021/ie071635a.
41. Nauman, E.B. Residence time distribution theory for unsteady stirred tank reactors. *Chemical Engineering Science* **1969**, *24*, 1461-1470, doi:[https://doi.org/10.1016/0009-2509\(69\)85074-8](https://doi.org/10.1016/0009-2509(69)85074-8).
42. Nauman, E.B. Residence times and cycle times in recycle systems. *Chemical Engineering Science* **1974**, *29*, 1883-1888, doi:[https://doi.org/10.1016/0009-2509\(74\)85005-0](https://doi.org/10.1016/0009-2509(74)85005-0).
43. Nauman, E.B. Mixing in Polymer Reactors. *Journal of Macromolecular Science, Part C* **1974**, *10*, 75-112, doi:10.1080/15321797408080005.
44. Nauman, E.B. Residence time distributions and micromixing. *Chemical Engineering Communications* **1981**, *8*, 53-131, doi:10.1080/00986448108912576.
45. Nauman, E.B. Residence time distributions in systems governed by the dispersion equation. *Chemical Engineering Science* **1981**, *36*, 957-966, doi:[https://doi.org/10.1016/0009-2509\(81\)80080-2](https://doi.org/10.1016/0009-2509(81)80080-2).
46. Nauman, E.B. Reactions and residence time distributions in motionless mixers. *The Canadian Journal of Chemical Engineering* **1982**, *60*, 136-140, doi:<https://doi.org/10.1002/cjce.5450600123>.
47. Nauman, E.B. On residence time and trajectory calculations in motionless mixers. *The Chemical Engineering Journal* **1991**, *47*, 141-148, doi:[https://doi.org/10.1016/0300-9467\(91\)85019-R](https://doi.org/10.1016/0300-9467(91)85019-R).
48. Nauman, E.B. Residence Time Distributions. In *Handbook of Industrial Mixing*; 2003; pp. 1-17.
49. Martin, A.D. Interpretation of residence time distribution data. *Chemical Engineering Science* **2000**, *55*, 5907-5917, doi:[https://doi.org/10.1016/S0009-2509\(00\)00108-1](https://doi.org/10.1016/S0009-2509(00)00108-1).
50. Burrows, L.J.; Stokes, A.J.; West, J.R.; Forster, C.F.; Martin, A.D. Evaluation of different analytical methods for tracer studies in aeration lanes of activated sludge plants. *Water Research* **1999**, *33*, 367-374, doi:[https://doi.org/10.1016/S0043-1354\(98\)00249-8](https://doi.org/10.1016/S0043-1354(98)00249-8).
51. Leclerc, J.; Claudel, S.; Lintz, H.; Potier, O.; Antoine, B. Theoretical interpretation of residence-time distribution measurements in industrial processes. *Oil & Gas Science and Technology* **2000**, *55*, 159-169.
52. Claudel, S.; Fonteix, C.; Leclerc, J.P.; Lintz, H.G. Application of the possibility theory to the compartment modelling of flow pattern in industrial processes. *Chemical Engineering Science* **2003**, *58*, 4005-4016, doi:[https://doi.org/10.1016/S0009-2509\(03\)00269-0](https://doi.org/10.1016/S0009-2509(03)00269-0).
53. Haag, J.; Gentric, C.; Lemaitre, C.; Leclerc, J.-P. Modelling of Chemical Reactors: From Systemic Approach to Compartmental Modelling. *International Journal of Chemical Reactor Engineering* **2018**, *16*, doi:10.1515/ijcre-2017-0172.
54. Levenspiel, O. *Chemical reaction engineering*; John Wiley & sons: 1998.
55. Schmidt, L.D. *The engineering of chemical reactions*; Oxford university press New York: 2005.
56. Nauman, E.B. *Chemical reactor design, optimization, and scaleup*; John Wiley & Sons: 2008.
57. Fogler, H.S. *Essentials of Chemical Reaction Engineering*; Pearson Education: 2010.
58. Fogler, H.S. *Elements of chemical reaction engineering*; Prentice Hall: 2016.
59. Green, D.W.; Southard, M.Z. *Perry's chemical engineers' handbook*; McGraw-Hill Education: 2019.
60. Ravi, R.; Vinu, R.; Gummadi, S.N. *Coulson and Richardson's Chemical Engineering: Volume 3A: Chemical and Biochemical Reactors and Reaction Engineering*; Butterworth-Heinemann: 2017.



61. Swaine, D.E.; Daugulis, A.J. Review of Liquid Mixing in Packed Bed Biological Reactors. *Biotechnology Progress* **1988**, *4*, 134-148, doi:10.1002/btpr.5420040304.
62. Ramaswamy, H.S.; Abdelrahim, K.A.; Simpson, B.K.; Smith, J.P. Residence time distribution (RTD) in aseptic processing of particulate foods: a review. *Food Research International* **1995**, *28*, 291-310, doi:[https://doi.org/10.1016/0963-9969\(95\)00005-7](https://doi.org/10.1016/0963-9969(95)00005-7).
63. Torres, A.P.; Oliveira, F.A.R. Residence time distribution studies in continuous thermal processing of liquid foods: a review. *Journal of Food Engineering* **1998**, *36*, 1-30, doi:[https://doi.org/10.1016/S0260-8774\(98\)00037-5](https://doi.org/10.1016/S0260-8774(98)00037-5).
64. Ganjyal, G.; Hanna, M. A Review on Residence Time Distribution (RTD) in Food Extruders and Study on the Potential of Neural Networks in RTD Modeling. *Journal of Food Science* **2002**, *67*, 1996-2002, doi:<https://doi.org/10.1111/j.1365-2621.2002.tb09491.x>.
65. Gao, Y.; Muzzio, F.J.; Ierapetritou, M.G. A review of the Residence Time Distribution (RTD) applications in solid unit operations. *Powder Technology* **2012**, *228*, 416-423, doi:<https://doi.org/10.1016/j.powtec.2012.05.060>.
66. Leray, S.; Engdahl, N.B.; Massoudieh, A.; Bresciani, E.; McCallum, J. Residence time distributions for hydrologic systems: Mechanistic foundations and steady-state analytical solutions. *Journal of Hydrology* **2016**, *543*, 67-87, doi:<https://doi.org/10.1016/j.jhydrol.2016.01.068>.
67. Sheoran, M.; Chandra, A.; Bhunia, H.; Bajpai, P.K.; Pant, H.J. Residence time distribution studies using radiotracers in chemical industry – A review. *Chemical Engineering Communications* **2018**, *205*, 739-758, doi:10.1080/00986445.2017.1410478.
68. Bérard, A.; Blais, B.; Patience, G.S. Experimental methods in chemical engineering: Residence time distribution—RTD. *The Canadian Journal of Chemical Engineering* **2020**, *98*, 848-867, doi:<https://doi.org/10.1002/cjce.23711>.
69. Reis, M.H.; Varner, T.P.; Leibfarth, F.A. The Influence of Residence Time Distribution on Continuous-Flow Polymerization. *Macromolecules* **2019**, *52*, 3551-3557, doi:10.1021/acs.macromol.9b00454.
70. Bhalode, P.; Tian, H.; Gupta, S.; Razavi, S.M.; Roman-Ospino, A.; Talebian, S.; Singh, R.; Scicolone, J.V.; Muzzio, F.J.; Ierapetritou, M. Using residence time distribution in pharmaceutical solid dose manufacturing – A critical review. *International Journal of Pharmaceutics* **2021**, *610*, 121248, doi:<https://doi.org/10.1016/j.ijpharm.2021.121248>.
71. Stephenson, R.; Sheridan, C. Review of experimental procedures and modelling techniques for flow behaviour and their relation to residence time in constructed wetlands. *Journal of Water Process Engineering* **2021**, *41*, 102044, doi:<https://doi.org/10.1016/j.jwpe.2021.102044>.
72. Rodrigues, A.E. Residence time distribution (RTD) revisited. *Chemical Engineering Science* **2021**, *230*, 116188, doi:<https://doi.org/10.1016/j.ces.2020.116188>.
73. Wang, Z.; Yang, Z.; Wang, X.; Yue, Q.; Xia, Z.; Xiao, H. Residence Time Distribution (RTD) Applications in Continuous Casting Tundish: A Review and New Perspectives. *Metals* **2022**, *12*, 1366.
74. Ding, C.; Lei, H.; Chen, S.; Zhang, H.; Zhao, Y.; Zou, Z. Challenge of Residence Time Distribution Curve in Tundish for Continuous Casting of Steel. *steel research international* **2022**, *93*, 2200187, doi:<https://doi.org/10.1002/srin.202200187>.
75. Sarkar, M.; Sangal, V.K.; Pant, H.J.; Sharma, V.K.; Bhunia, H.; Bajpai, P.K. Application of tracer technology in wastewater treatment processes: a review. *Chemical Engineering Communications* **2023**, *210*, 16-33, doi:10.1080/00986445.2021.1995371.
76. Cherkasov, N.; Adams, S.J.; Bainbridge, E.G.A.; Thornton, J.A.M. Continuous stirred tank reactors in fine chemical synthesis for efficient mixing, solids-handling, and rapid scale-up. *Reaction Chemistry & Engineering* **2023**, doi:10.1039/D2RE00232A.

77. Patrick Jr., R.H.; Klindera, T.; Crynes, L.L.; Cerro, R.L.; Abraham, M.A. Residence time distribution in three-phase monolith reactor. *AIChE Journal* **1995**, *41*, 649-657, doi:<https://doi.org/10.1002/aic.690410321>.
78. Bachmann, P.; Bück, A.; Tsotsas, E. Experimental investigation and correlation of the Bodenstein number in horizontal fluidized beds with internal baffles. *Powder Technology* **2017**, *308*, 378-387, doi:<https://doi.org/10.1016/j.powtec.2016.11.025>.
79. Shadpoor, S.; Pirouzi, A.; Hamze, H.; Mazaheri, D. Determination of Bodenstein number and axial dispersion of a triangular external loop airlift reactor. *Chemical Engineering Research and Design* **2021**, *165*, 61-68, doi:<https://doi.org/10.1016/j.cherd.2020.10.018>.
80. Pietsch, S.; Schönherr, M.; Kleine Jäger, F.; Heinrich, S. Measurement of Residence Time Distributions in a Continuously Operated Spouted Bed. *Chemical Engineering & Technology* **2020**, *43*, 804-812, doi:<https://doi.org/10.1002/ceat.201900453>.
81. Mason, D.R.; Piret, E.L. Continuous Flow Stirred Tank Reactor Systems. *Industrial & Engineering Chemistry* **1950**, *42*, 817-825, doi:10.1021/ie50485a022.
82. Li, S. Chapter 5 - Residence Time Distribution and Flow Models for Reactors. In *Reaction Engineering*, Li, S., Ed.; Butterworth-Heinemann: Boston, 2017; pp. 213-263.
83. Ravi, R. Chapter 2 - Flow Characteristics of Reactors—Flow Modeling. In *Coulson and Richardson's Chemical Engineering (Fourth Edition)*, Ravi, R., Vinu, R., Gummadi, S.N., Eds.; Butterworth-Heinemann: 2017; pp. 103-160.
84. Real Reactors and Residence Time Distribution (RTD). In *Microstructured Devices for Chemical Processing*; 2014; pp. 89-128.
